# Supplementary material for: Serotonin 2A Receptor Attenuates Psoriatic Inflammation by Suppressing IL-23 Secretion in Monocyte-derived Langerhans Cells
Source: Research Square preprint supplement (doi:10.21203/rs.3.rs-5628384/v1), 2025-01-05
Supplement: Supplementary file 1 [file 96252410f521de033a75240b.pdf]

Reporting Summary

Nature Portfolio wishes to improve the reproducibility of the work that we publish. This form provides structure for consistency and transparency in reporting. For further information on Nature Portfolio policies, see our [Editorial Policies](#) and the [Editorial Policy Checklist](#).

Statistics

For all statistical analyses, confirm that the following items are present in the figure legend, table legend, main text, or Methods section.

|                                     |                                                                                                                                                                                                                                                                                                |
|-------------------------------------|------------------------------------------------------------------------------------------------------------------------------------------------------------------------------------------------------------------------------------------------------------------------------------------------|
| n/a                                 | Confirmed                                                                                                                                                                                                                                                                                      |
| <input checked="" type="checkbox"/> | <input checked="" type="checkbox"/> The exact sample size ( <i>n</i> ) for each experimental group/condition, given as a discrete number and unit of measurement                                                                                                                               |
| <input checked="" type="checkbox"/> | <input checked="" type="checkbox"/> A statement on whether measurements were taken from distinct samples or whether the same sample was measured repeatedly                                                                                                                                    |
| <input checked="" type="checkbox"/> | <input checked="" type="checkbox"/> The statistical test(s) used AND whether they are one- or two-sided<br><i>Only common tests should be described solely by name; describe more complex techniques in the Methods section.</i>                                                               |
| <input checked="" type="checkbox"/> | <input checked="" type="checkbox"/> A description of all covariates tested                                                                                                                                                                                                                     |
| <input checked="" type="checkbox"/> | <input checked="" type="checkbox"/> A description of any assumptions or corrections, such as tests of normality and adjustment for multiple comparisons                                                                                                                                        |
| <input checked="" type="checkbox"/> | <input checked="" type="checkbox"/> A full description of the statistical parameters including central tendency (e.g. means) or other basic estimates (e.g. regression coefficient) AND variation (e.g. standard deviation) or associated estimates of uncertainty (e.g. confidence intervals) |
| <input checked="" type="checkbox"/> | <input type="checkbox"/> For null hypothesis testing, the test statistic (e.g. <i>F</i> , <i>t</i> , <i>r</i> ) with confidence intervals, effect sizes, degrees of freedom and <i>P</i> value noted<br><i>Give P values as exact values whenever suitable.</i>                                |
| <input checked="" type="checkbox"/> | <input type="checkbox"/> For Bayesian analysis, information on the choice of priors and Markov chain Monte Carlo settings                                                                                                                                                                      |
| <input checked="" type="checkbox"/> | <input type="checkbox"/> For hierarchical and complex designs, identification of the appropriate level for tests and full reporting of outcomes                                                                                                                                                |
| <input checked="" type="checkbox"/> | <input type="checkbox"/> Estimates of effect sizes (e.g. Cohen's <i>d</i> , Pearson's <i>r</i> ), indicating how they were calculated                                                                                                                                                          |

Our web collection on [statistics for biologists](#) contains articles on many of the points above.

Software and code

Policy information about [availability of computer code](#)

|                 |                                                                                                                                                                                                                                                                                                                                                                                                                       |
|-----------------|-----------------------------------------------------------------------------------------------------------------------------------------------------------------------------------------------------------------------------------------------------------------------------------------------------------------------------------------------------------------------------------------------------------------------|
| Data collection | SAS software was used to collect Taiwan's National Health Insurance Data.                                                                                                                                                                                                                                                                                                                                             |
| Data analysis   | FlowJo v10 was used to analyze flow cytometry data. Prism v8 was used to perform all statistical calculations. iDEP2.01 was used to analyze processed RNA-sequencing data. R v4.3.3 was used to preprocess RNA-sequencing data and analyze single-cell RNA sequencing data. ImageJ and CaseViewer was used to analyze histological slides. Zen (Black edition) system 2.3 was used to analyze immunofluorescent data. |

For manuscripts utilizing custom algorithms or software that are central to the research but not yet described in published literature, software must be made available to editors and reviewers. We strongly encourage code deposition in a community repository (e.g. GitHub). See the Nature Portfolio [guidelines for submitting code & software](#) for further information.

## Data

Policy information about [availability of data](#)

All manuscripts must include a [data availability statement](#). This statement should provide the following information, where applicable:

- Accession codes, unique identifiers, or web links for publicly available datasets
- A description of any restrictions on data availability
- For clinical datasets or third party data, please ensure that the statement adheres to our [policy](#)

Publicly available dataset from the Gene Expression Omnibus database under accession number GSE222197, GSE151177, and GSE162183 were used. In this study, we deposited two datasets into the Gene Expression Omnibus database under accession number GSE274941 (evohcgwqhfpjwr) and GSE274449 (cfopqwiyfhwvot). Their access tokens are in brackets.

## Research involving human participants, their data, or biological material

Policy information about studies with [human participants or human data](#). See also policy information about [sex, gender \(identity/presentation\), and sexual orientation](#) and [race, ethnicity and racism](#).

|                                                                    |                                                                                                                                                                                                                                                                                                                                                                     |
|--------------------------------------------------------------------|---------------------------------------------------------------------------------------------------------------------------------------------------------------------------------------------------------------------------------------------------------------------------------------------------------------------------------------------------------------------|
| Reporting on sex and gender                                        | Our study did not involve any reporting on sex and gender.                                                                                                                                                                                                                                                                                                          |
| Reporting on race, ethnicity, or other socially relevant groupings | Our study did not involve any reporting on race, ethnicity, or other socially relevant groupings.                                                                                                                                                                                                                                                                   |
| Population characteristics                                         | Our study did not involve any reporting on population characteristics.                                                                                                                                                                                                                                                                                              |
| Recruitment                                                        | Our study used human data from Taiwan's National Health Insurance Depository. We used it for analysis only and at no point was any subject personally identified. We recruited 3 healthy patients to donate their healthy skin samples and 3 psoriatic patients to donate their lesioned psoriatic skin.                                                            |
| Ethics oversight                                                   | The collection of Taiwan's National Health Insurance Depository data was approved by Academia Sinica's Institutional Review Board for Biomedical Science Research with IRB number (AS-IRB-BM-23014). The collection of skin samples was approved by Academia Sinica's Institutional Review Board for Biomedical Science Research with IRB number (AS-IRB-BM-20062). |

Note that full information on the approval of the study protocol must also be provided in the manuscript.

## Field-specific reporting

Please select the one below that is the best fit for your research. If you are not sure, read the appropriate sections before making your selection.

- ☒ Life sciences      ☐ Behavioural & social sciences      ☐ Ecological, evolutionary & environmental sciences

For a reference copy of the document with all sections, see [nature.com/documents/nr-reporting-summary-flat.pdf](https://www.nature.com/documents/nr-reporting-summary-flat.pdf)

## Life sciences study design

All studies must disclose on these points even when the disclosure is negative.

|                 |                                                                                                                                                                                |
|-----------------|--------------------------------------------------------------------------------------------------------------------------------------------------------------------------------|
| Sample size     | The sample size for the respective figures is included in the figure legend.                                                                                                   |
| Data exclusions | We did not exclude any data.                                                                                                                                                   |
| Replication     | All experiments were repeated at least twice.                                                                                                                                  |
| Randomization   | The sex and age of mice was randomly assigned in this study.                                                                                                                   |
| Blinding        | The investigator was not blinded in this study. However, we ensure our data is a representation of the biological conditions by ensuring our data measurements are repeatable. |

## Reporting for specific materials, systems and methods

We require information from authors about some types of materials, experimental systems and methods used in many studies. Here, indicate whether each material, system or method listed is relevant to your study. If you are not sure if a list item applies to your research, read the appropriate section before selecting a response.

## Materials &amp; experimental systems

|                                     |                                                        |
|-------------------------------------|--------------------------------------------------------|
| n/a                                 | Involved in the study                                  |
| <input type="checkbox"/>            | <input checked="" type="checkbox"/> Antibodies         |
| <input checked="" type="checkbox"/> | <input type="checkbox"/> Eukaryotic cell lines         |
| <input checked="" type="checkbox"/> | <input type="checkbox"/> Palaeontology and archaeology |
| <input checked="" type="checkbox"/> | <input type="checkbox"/> Animals and other organisms   |
| <input type="checkbox"/>            | <input checked="" type="checkbox"/> Clinical data      |
| <input checked="" type="checkbox"/> | <input type="checkbox"/> Dual use research of concern  |
| <input checked="" type="checkbox"/> | <input type="checkbox"/> Plants                        |

## Methods

|                                     |                                                    |
|-------------------------------------|----------------------------------------------------|
| n/a                                 | Involved in the study                              |
| <input checked="" type="checkbox"/> | <input type="checkbox"/> ChIP-seq                  |
| <input type="checkbox"/>            | <input checked="" type="checkbox"/> Flow cytometry |
| <input checked="" type="checkbox"/> | <input type="checkbox"/> MRI-based neuroimaging    |

## Antibodies

## Antibodies used

PE/Dazzle594 anti-mouse CD45 Antibody Biolegend Cat# 103146; RRID: AB\_2564003  
 APC/Cy7 anti-mouse CD4 Antibody Biolegend Cat# 100414; RRID: AB\_312699  
 APC anti-mouse gd TCR Antibody Biolegend Cat# 118115; RRID: AB\_1731824  
 PE/Cy7 anti-mouse CD3 Antibody Biolegend Cat# 100220; RRID: AB\_1732057  
 PerCP eFluor710 anti-mouse IL-22 Antibody Invitrogen Cat# 46-7222-82; RRID: AB\_2573839  
 PE anti-mouse CD11b Antibody Biolegend Cat# 101208; RRID: AB\_312791  
 Alexa Fluor 488 anti-mouse Gr-1 Antibody Biolegend Cat# 108417; RRID: AB\_389309  
 FITC anti-mouse CD3 Antibody Biolegend Cat# 100306; RRID: AB\_312671  
 PE/Cy7 anti-mouse gdTCR Antibody Invitrogen Cat# 25-5711-82; RRID: AB\_2573464  
 eFluor 506 anti-mouse IL-17A Antibody Invitrogen Cat# 69-7177-82; RRID: AB\_2637303  
 Alexa Fluor 647 anti-mouse Ly6G Antibody Biolegend Cat# 127610; RRID: AB\_1134159  
 FITC anti-mouse CD45.1 Antibody Biolegend Cat# 110706; RRID: AB\_313495  
 APC-eFluor 780 anti-mouse MHC II Antibody Invitrogen Cat# 47-5321-82; RRID: AB\_1548783  
 eFluor 506 anti-mouse CD11c Antibody Invitrogen Cat# 69-0114-80; RRID: AB\_2637426  
 PerCP/cy5.5 anti-mouse CD11b Antibody Invitrogen Cat# 45-0112-80; RRID: AB\_953560  
 eFluor 450 anti-mouse CD103 Antibody Invitrogen Cat# 48-1031-80; RRID: AB\_2574032  
 PE anti-mouse CD207 Antibody Biolegend Cat# 144204; RRID: AB\_2561499  
 Alexa Fluor 647 anti-mouse CD317 Antibody Biolegend Cat# 127014; RRID: AB\_1953289  
 BV421 anti-mouse Vg4 Antibody BD Cat# 742308; RRID: AB\_2740689  
 APC anti-mouse CD11b Antibody Biolegend Cat# 101212; RRID: AB\_312795  
 PE anti-mouse Gr1 Antibody eBioscience Cat# 12-5931-82; RRID: AB\_466045  
 BV421 anti-mouse I-A/I-E Antibody Biolegend Cat# 107632; RRID: AB\_2650896  
 BV650 anti-mouse XCR1 Antibody Biolegend Cat# 148220; RRID: AB\_2566410  
 APC eFluor 780 anti-mouse CD64 Antibody Invitrogen Cat# 47-0641-80; RRID: AB\_2735011  
 PerCP/eFluor710 anti-mouse MerTK Antibody Invitrogen Cat# 46-5751-80; RRID: AB\_2688093  
 BV786 anti-mouse CCR2 Antibody BD Cat# 747966; RRID: AB\_2872427  
 APC anti-mouse Ly6G Antibody Biolegend Cat# 127613; RRID: AB\_1877163  
 Alexa Fluor 700 anti-mouse Ly6C Antibody Biolegend Cat# 128024; RRID: AB\_10643270  
 Alexa Fluor 488 anti-mouse IL-23 Antibody Invitrogen Cat# 53-7023-82; RRID: AB\_2574435  
 BV605 anti-mouse CD3 Antibody Biolegend Cat# 100306; RRID: AB\_312671  
 Anti-mouse CD16/32 Antibody Biolegend Cat# 101302; RRID: AB\_312801  
 eFluor 506 Fixable Viability Dye eBioscience Cat# 65-0866-14  
 Live/Dead Fixable Blue Invitrogen Cat# L23105  
 Anti-mouse IL-23r Antibody R and D Systems Cat# MAB1686; RRID: AB\_2124650  
 Rat IgG2b In Vivo Isotype Control Ichor Bio Cat# ICH2243; RRID: AB\_2921378  
 Anti-mouse phospho-NF-kB p65 (Ser536) Antibody Affinity Biosciences Cat# AF2006; RRID: AB\_2834435  
 Anti-mouse NFkB2 p100/p52 Antibody 4882 Cell Signaling Cat# 4888; RRID: AB\_915969  
 Anti-mouse RelB (C1E4) Rabbit mAb 4922 Cell Signaling Cat# 4888; RRID: AB\_915969  
 beta-Actin (ACTB) Monoclonal Antibody (ACTB/2370) Thermo Scientific Cat# MA5-15739; RRID: AB\_10979409  
 GAPDH Loading Control Monoclonal Antibody (GA1R) Invitrogen Cat# MA5-15738; RRID: AB\_10977387  
 Purified anti-mouse CD40 Antibody Biolegend Cat# 102901 (HM40-3); RRID: AB\_312944  
 Anti-Serotonin Antibody [YC5/45] Abcam Cat# AB6336; RRID: AB\_449517  
 Anti-human CD1a Antibody R&D Systems Cat# MAB7076; RRID: AB\_10973620  
 Anti-human HTR2A Antibody biorbyt Cat# Orb10009; RRID: AB\_10750020  
 Goat anti-mouse FITC Jackson Immunoresearch Cat# 115-095-006; RRID: AB\_2338590  
 Goat anti-rabbit RFP Jackson Immunoresearch Cat# 111-025-006; RRID: AB\_2337927  
 Goat anti-rabbit IgG (H+L) Secondary Antibody HRP Thermo Scientific Cat# 31460; RRID: AB\_228341  
 Goat anti-mouse IgG (H+L) Secondary Antibody HRP Thermo Scientific Cat# 31430; RRID: AB\_228307

## Validation

We did not develop any primary antibody.

## Clinical data

Policy information about [clinical studies](#)

All manuscripts should comply with the ICMJE [guidelines for publication of clinical research](#) and a completed [CONSORT checklist](#) must be included with all submissions.

|                             |                                                                                                                                                                                                                                                                                                                                                                                                                                                                                                                                                                                                                                                                                                                                                                                                                                                                                                                                 |
|-----------------------------|---------------------------------------------------------------------------------------------------------------------------------------------------------------------------------------------------------------------------------------------------------------------------------------------------------------------------------------------------------------------------------------------------------------------------------------------------------------------------------------------------------------------------------------------------------------------------------------------------------------------------------------------------------------------------------------------------------------------------------------------------------------------------------------------------------------------------------------------------------------------------------------------------------------------------------|
| Clinical trial registration | IRB number AS-IRB-BM-20062 was used for collection of skin samples. IRB number AS-IRB-BM-23014 was used to analyze data from Taiwan's National Health Insurance Depository.                                                                                                                                                                                                                                                                                                                                                                                                                                                                                                                                                                                                                                                                                                                                                     |
| Study protocol              | For AS-IRB-BM-20062, we collected 3 skin samples from healthy donors and psoriatic patients respectively. The skin sample was halved, with one half being treated with DOI and the other half serving as a control.<br>For AS-IRB-BM-23014, we identified psoriatic patients using the codes 696.1 and 696.8 in the International Classification of Diseases 9 (ICD9). We then checked for SSRI and anti-psychotic exposure. Those with SSRI exposure were categorized under SSRI, those with anti-psychotic exposure were categorized under anti-psychotic, and those with no exposure were categorized under control. Patients with both SSRI and anti-psychotic use were excluded.                                                                                                                                                                                                                                           |
| Data collection             | For AS-IRB-BM-20062, we accessed data from Taiwan's National Health Insurance Depository.<br>For AS-IRB-BM-23014, we collaborated with doctors from the Department of Dermatology, National Taiwan University Hospital and Department of Dermatology, Taipei Medical University-Shuang Ho Hospital to collect skin samples.                                                                                                                                                                                                                                                                                                                                                                                                                                                                                                                                                                                                     |
| Outcomes                    | For AS-IRB-BM-20062, we looked at changes in transcriptome. Differentially expressed genes (DEGs) between healthy non-treated and lesioned non-treated are considered psoriatic genes. We then looked at DEGs of lesioned treated versus lesioned non-treated and compared it with psoriatic genes to determine if there are any overlap. The overlapped genes are psoriatic genes affected by serotonin 2A receptor.<br>For AS-IRB-BM-23014, treatment received was divided into 4 different categories, Topical, Systemic, Combination, and Biologics with Topical being the mildest and Biologics being the most severe according to Taiwan Dermatological Association. We then tracked changes in treatment received for 6 months as a surrogate for psoriatic severity. For example, if a patient has to change from using Topical treatment to Biologics treatment, this is considered a worsening of psoriatic symptoms. |

## Plants

|                       |     |
|-----------------------|-----|
| Seed stocks           | N/A |
| Novel plant genotypes | N/A |
| Authentication        | N/A |

## Flow Cytometry

### Plots

Confirm that:

- ☒ The axis labels state the marker and fluorochrome used (e.g. CD4-FITC).
- ☒ The axis scales are clearly visible. Include numbers along axes only for bottom left plot of group (a 'group' is an analysis of identical markers).
- ☒ All plots are contour plots with outliers or pseudocolor plots.
- ☒ A numerical value for number of cells or percentage (with statistics) is provided.

### Methodology

|                           |                                                                                                                                                                                                                                                                                                                                                                                                                                                                                                                                                   |
|---------------------------|---------------------------------------------------------------------------------------------------------------------------------------------------------------------------------------------------------------------------------------------------------------------------------------------------------------------------------------------------------------------------------------------------------------------------------------------------------------------------------------------------------------------------------------------------|
| Sample preparation        | Cells were isolated from the ears by incubating overnight at 37°C with Dispase II (Thermo Scientific). The next day, the ear is then cut by scissors into small pieces and then immersed in RPMI (Gibco) containing Collagenase IV (Gibco) and DNase I (Bio Basic) for 90 minutes. The sample is then filtered using a 70µm cell strainer. The isolated single cells were then stained directly with fluorescent antibodies or treated with PMA (Merck), Ionomycin (BioGems), and GolgiStop (BD) if intracellular cytokine staining was required. |
| Instrument                | BD® LSR II Flow Cytometer                                                                                                                                                                                                                                                                                                                                                                                                                                                                                                                         |
| Software                  | FlowJo v10                                                                                                                                                                                                                                                                                                                                                                                                                                                                                                                                        |
| Cell population abundance | For Vg4 T cells, there are at least 100 cells per sample for all figures. For neutrophils, there are at least 1000 cells per sample for all figures. For IL23+ cells in Figure 5C, there are at least 100 cells per cell type. For Figure 5I, there are around 100 IL23+                                                                                                                                                                                                                                                                          |

moLCs in the control group and around 30 IL23+ moLCs in the DOI-treated group.

Gating strategy

Our gating strategy for IL17+ IL22+ Vg4 T cells and neutrophils are as Supplementary Figure S2. Our gating strategy for sorted moLCs are as Supplementary Figure S6. Our gating strategy for Figure 5C are as supplementary Figure S7.

☒ Tick this box to confirm that a figure exemplifying the gating strategy is provided in the Supplementary Information.
