# Supplementary material for: Serotonin 2A Receptor Attenuates Psoriatic Inflammation by Suppressing IL-23 Secretion in Monocyte-derived Langerhans Cells
Source: Research Square preprint supplement (doi:10.21203/rs.3.rs-5628384/v1), 2025-01-05
Supplement: Supplementary file 3 [file f277f4b4d151b9c714f3edb4.pdf]

## GEO Dataset

We have deposited our RNA sequencing data into the GEO database; hence, we are not depositing it in other repositories.

The tokens for accessing our datasets are as follows.

| Dataset   | Token           |
|-----------|-----------------|
| GSE274941 | evohcgwqhfpjwr  |
| GSE274449 | cfopqwiyfhwdvot |
